# Supplementary material for: Gender dimorphic M1 excitability during emotional processing: a transcranial magnetic stimulation study
Source: PeerJ. 2022 Aug 30;10:e13987. doi: 10.7717/peerj.13987 (PMC9438768; doi:10.7717/peerj.13987)
Supplement: Data S1 [file peerj-10-13987-s001.xlsx]

## Sheet: 100人信息
sub	gender	hemisphere	baseline	negative170ms	neutral170ms	positive170ms	negative250ms	neutral250ms	positive250ms	negative350ms	neutral350ms	positive350ms	negative450ms	neutral450ms	positive450ms	negative accuracy	neutral accuracy	positive accuracy
1	male	right	0.804497	1.26829	0.879386	1.03793	1.17883	1.06495	1.10016	1.35647	1.25001	1.29688	1.03415	1.46649	1.00322	1	0.85	0.85
2	male	right	1.16518	1.75102	1.59003	2.46843	2.83843	1.91615	2.59069	2.01104	1.59901	3.67235	2.03461	2.00415	2.32843	0.8	0.85	0.8
3	male	right	1.79841	1.75357	1.1587	1.35183	1.14527	1.24115	1.36556	1.31957	1.47089	1.38807	1.24217	1.56346	1.2366	0.8	0.8	0.95
4	male	right	0.589133	1.6191	0.947242	0.98134	0.825403	1.77867	1.6652	1.41655	1.61123	1.46919	1.89398	1.17866	1.18537	0.85	0.8	0.95
5	male	right	0.373728	1.38057	1.26222	2.5246	2.65856	1.00223	3.03788	2.6285	2.48136	3.32378	3.08002	1.68076	2.27526	0.9	0.7	0.5
6	male	right	1.17667	3.31807	1.91253	1.40963	1.09561	1.20925	2.09822	2.27661	0.966658	1.66199	1.56605	1.66969	1.36639	0.65	0.75	1
7	male	right	1.81873	2.60688	1.45098	1.51329	1.33399	1.88258	2.06081	2.46462	1.32981	2.77163	2.10811	2.16647	3.196	0.9	0.65	1
8	male	right	1.48274	1.6491	1.08976	1.1209	1.07657	1.24354	1.33544	1.22447	0.852233	1.30753	1.10152	1.00474	1.24298	0.85	0.85	0.9
9	male	right	1.88938	0.6881	0.914757	0.154606	0.191565	0.212288	0.272265	0.555832	0.154795	0.140887	0.776902	0.900806	0.633416	1	0.65	0.9
10	male	right	0.713553	1.093	1.94792	2.38809	1.25732	0.918739	2.89564	1.66471	1.6104	2.66685	1.60396	1.55984	2.44532	0.95	0.85	0.75
11	male	right	0.985285	0.871917	1.15562	1.22858	0.907875	0.975679	0.766621	1.30467	1.17801	1.14865	1.1975	0.766057	0.51661	0.95	0.9	0.7
12	male	right	1.38482	0.933855	0.706317	0.651493	0.713882	1.1375	0.899795	0.339346	0.554645	0.796411	0.505024	0.720633	0.409929	0.95	0.85	0.9
13	male	right	1.5013	1.10562	1.22987	1.10787	0.803711	1.42858	1.09495	0.894334	1.05883	1.09347	1.21402	1.0677	1.0054	0.9	0.8	0.9
14	male	right	2.00786	2.49609	2.38885	1.90473	1.77958	1.99744	1.67039	1.86471	1.72015	2.89991	1.83308	2.15498	2.21103	1	0.8	0.5
15	male	right	1.67242	2.67349	2.19035	1.91	1.61529	2.13349	2.56363	2.1718	2.03531	2.87793	1.97583	2.66594	2.0934	0.95	0.8	0.7
16	male	right	0.790739	1.40683	0.982928	0.902365	1.01274	1.25661	0.96701	1.02396	1.07612	1.12244	1.11976	1.49091	1.27952	1	0.7	0.9
17	male	right	1.00545	1.45057	1.18752	1.9629	1.90699	1.25102	1.2944	1.82651	2.08544	2.16386	1.26025	1.66165	1.57231	0.85	0.5	0.95
18	male	right	0.224993	1.98514	2.69049	1.18625	1.86525	1.40885	1.78669	1.6694	1.41182	1.57001	1.58161	1.91061	1.68021	0.9	0.7	0.9
19	male	right	0.471878	0.9597	0.96734	1.31815	1.67092	1.20562	1.13705	1.36441	1.11989	1.08539	1.20394	1.22008	1.05636	0.9	0.85	1
20	male	right	0.687386	1.22759	1.31529	1.10934	0.936407	1.83727	1.26004	1.12067	0.931095	1.6584	1.01355	1.2138	1.14696	0.95	0.8	0.9
21	male	right	0.746681	1.09166	1.58093	1.43822	1.4528	1.55797	1.8172	1.53688	1.24508	1.61855	1.97672	1.80786	1.41291	0.65	0.9	0.8
22	male	right	0.489002	3.08829	2.10699	0.666725	3.04913	3.99837	1.87366	0.220222	2.19011	1.91527	2.52397	1.51433	1.86892	0.6	0.95	0.85
23	male	right	0.390253	0.521346	1.19049	1.37149	0.591677	0.977493	0.696073	0.796462	0.580631	0.833662	0.784379	0.605915	0.797568	0.95	0.8	0.5
24	male	right	0.919373	2.35251	2.43473	0.562803	2.17523	2.14097	2.39713	1.40324	1.62617	2.54568	1.83273	1.82624	1.38757	0.95	0.95	0.3
25	male	right	1.20099	1.92936	1.40008	1.69197	1.76877	1.85234	1.39581	1.14798	1.52343	1.5261	1.65913	1.94089	1.49671	0.8	0.8	0.8
26	male	left	0.80938	1.12579	1.25228	1.45533	2.71501	0.879448	1.01506	2.39073	1.07206	0.829036	1.50728	1.40822	1.01403	0.75	1	0.25
27	male	left	1.42591	1.72236	1.82102	1.89819	1.91299	1.75127	1.7981	1.85917	1.77403	1.84392	1.77148	2.11515	1.72979	0.5	1	1
28	male	left	0.481346	2.98516	2.23005	2.30979	2.26998	3.14162	2.62224	2.9584	2.61999	1.90256	3.81795	1.64703	2.44367	0.75	0.95	0.65
29	male	left	0.694127	1.17687	1.45306	0.953218	2.03965	1.43784	0.641719	0.513149	1.88997	1.38335	1.36321	2.12817	0.573529	0.95	0.95	0.95
30	male	left	0.704521	1.01648	1.09748	1.07017	1.57584	1.18599	1.18897	1.47662	1.21194	1.43792	1.34687	1.34672	0.754238	0.85	0.95	0.9
31	male	left	1.72107	1.18218	1.16014	1.85023	1.39084	1.15327	1.14732	0.796966	1.60792	1.6488	0.953614	1.12167	1.57969	0.7	0.75	1
32	male	left	3.89413	1.35907	1.18849	1.02734	1.12849	1.32252	1.4885	1.46819	1.25199	1.54641	1.42391	1.43674	1.1773	0.95	0.75	1
33	male	left	1.68119	1.09523	0.883149	1.22948	0.848178	0.936635	0.614106	0.760187	0.851999	0.860036	0.602604	0.897473	0.606894	0.95	0.95	0.8
34	male	left	1.19878	1.20079	0.965175	0.579743	1.03558	0.545617	0.915783	1.03821	0.908501	0.577898	1.06694	0.834382	0.916046	0.95	0.9	0.6
35	male	left	1.31812	1.65822	0.742069	1.13295	0.96291	0.925041	1.67423	1.08464	1.48288	1.49597	1.84534	1.51321	0.690869	0.95	0.8	0.8
36	male	left	1.26015	1.61391	1.81939	1.15192	1.48542	1.27832	1.77847	1.49591	1.88207	2.05925	1.75734	1.48567	1.45112	0.85	1	0.9
37	male	left	1.20776	1.94346	1.30944	1.19271	1.13828	0.948303	1.4022	1.16277	1.46067	1.14322	1.27705	0.985465	1.11984	0.9	0.7	0.9
38	male	left	0.844765	1.08939	1.52813	1.06898	2.25969	0.446271	1.0748	0.935724	0.965897	1.15981	0.542967	1.11366	1.58121	0.9	0.85	0.7
39	male	left	1.27189	0.673218	0.629587	0.626498	0.584881	0.519121	0.489156	0.588997	0.309455	0.495099	0.358496	0.340084	0.206245	0.85	0.95	0.8
40	male	left	2.42398	0.868995	1.12726	0.722561	0.684645	0.681805	0.910802	0.803773	0.966682	0.941644	0.91271	0.744156	0.87025	0.9	0.9	0.95
41	male	left	0.950493	1.15092	1.04489	1.20337	1.05154	0.860756	1.2408	0.971128	1.1265	1.29319	1.21563	0.9556	0.954521	0.95	0.9	0.8
42	male	left	0.94195	0.730304	0.82972	1.10956	0.825535	0.551835	0.909379	1.04361	1.30171	1.04898	0.974492	0.884866	1.47064	0.75	0.7	0.75
43	male	left	3.25657	0.923374	0.890364	0.778383	0.870948	1.08777	0.882832	0.71926	0.758386	1.05089	0.742841	1.31077	1.01107	0.95	0.75	0.95
44	male	left	0.820137	1.30282	1.92743	1.04177	1.45803	1.16119	1.88303	1.32045	1.53923	1.38249	1.53031	1.14006	1.52611	0.95	0.65	1
45	male	left	1.19345	1.56605	1.78793	1.49178	1.19938	1.32299	1.78714	1.46946	1.767	1.33965	1.85125	1.63628	1.41007	1	0.95	0.9
46	male	left	1.53022	1.68471	1.72225	2.01376	1.57143	1.78177	1.6586	1.59207	1.23213	1.80417	1.24264	1.67138	2.0082	1	0.95	0.6
47	male	left	0.892593	2.13045	0.659042	0.885857	0.637661	1.58609	1.88572	1.52832	1.95879	1.54403	2.00495	0.960904	1.34381	0.85	0.6	0.85
48	male	left	1.50051	0.673905	1.11693	0.567142	0.665024	0.986573	0.693588	0.817167	0.485268	0.669001	0.649743	0.556539	0.497108	0.9	0.95	0.95
49	male	left	1.64269	1.59444	0.918379	1.57288	0.999412	0.85311	1.37836	1.17023	0.77232	1.03085	1.25557	0.906131	1.61512	0.9	0.9	0.8
50	male	left	0.844917	2.41315	2.04278	1.71941	2.45627	2.97648	1.68935	2.23434	1.81871	1.46533	1.68866	2.261	2.99798	0.9	0.85	0.7
51	female	right	1.69131	0.793562	1.04067	1.18728	0.962259	0.799594	0.935855	0.96689	0.751915	0.986558	0.994632	0.657888	0.983102	1	0.65	0.95
52	female	right	1.21465	0.927116	1.02938	0.779935	1.05276	0.678912	0.667747	0.749016	0.514191	0.781038	0.974106	0.695321	1.18623	0.65	0.8	0.75
53	female	right	0.388985	2.97151	2.5567	3.49311	2.50068	2.88664	2.38154	2.95124	2.31083	2.42712	1.86731	2.36525	2.43414	0.9	0.75	0.95
54	female	right	1.32081	1.25873	1.52507	1.71524	1.82724	1.14127	1.62766	1.5735	1.32132	1.60555	1.59865	1.84849	1.84842	0.95	0.95	0.65
55	female	right	0.703712	1.22756	1.46756	1.2531	1.50711	1.2539	1.31369	1.03326	1.88991	1.33439	1.89016	0.959441	1.27384	0.95	0.75	1
56	female	right	2.98126	1.15968	1.19002	1.06945	0.925082	1.0702	1.08482	0.95319	1.25258	1.02803	0.921043	0.882409	0.930853	0.85	0.95	0.4
57	female	right	3.46619	1.32811	1.09783	1.21293	1.3682	1.03422	1.28625	1.14752	1.29196	1.27614	1.35542	1.4585	1.61104	0.55	0.9	0.65
58	female	right	1.86399	1.55497	1.63761	1.7644	1.58641	1.55728	1.54916	1.93617	1.1244	1.59201	1.56636	1.89665	1.62407	0.85	0.65	0.95
59	female	right	0.618575	1.08335	0.552555	0.493247	1.01671	1.07885	1.40772	0.983608	1.00182	0.60545	0.612991	1.51171	1.20175	1	0.8	0.85
60	female	right	0.929762	1.24205	1.87007	1.27041	1.55544	1.69162	1.33345	2.01894	1.63949	1.25285	1.49359	1.19908	1.78692	0.6	0.8	0.8
61	female	right	1.50208	0.646313	1.12035	0.818078	1.50162	1.00436	0.799908	0.980615	0.919007	0.894054	0.883805	0.763016	0.9112	0.9	0.6	0.95
62	female	right	2.49207	0.850562	0.647849	0.754268	0.619207	0.914515	1.02823	0.828086	0.529166	0.656162	0.672092	0.484518	1.01135	0.9	0.95	0.95
63	female	right	0.716918	2.35998	1.81982	1.77725	1.52944	2.69365	2.01572	1.36214	1.09703	1.22574	1.83669	1.81296	1.77495	0.95	0.75	0.9
64	female	right	0.664725	3.48726	2.41037	1.94664	3.35492	2.45402	2.34996	2.52165	2.24809	1.92139	2.13475	2.63406	2.88757	0.7	0.7	0.95
65	female	right	0.525414	0.840299	0.516309	0.712263	1.05577	0.92381	0.847181	0.5975	0.848847	0.587255	0.793671	1.08234	1.21841	0.95	0.75	0.8
66	female	right	0.843379	1.04098	1.87568	1.14869	1.61452	1.48053	1.23791	1.70881	1.33135	0.934898	0.563489	0.817377	1.08387	1	0.8	0.65
67	female	right	2.55647	1.14166	0.912125	1.16202	0.944428	1.04514	1.06612	1.11818	1.20698	1.00881	0.883046	0.781741	0.780772	0.95	0.55	0.95
68	female	right	0.731278	2.18996	2.07088	1.45851	0.89184	1.36071	1.59933	1.5718	1.10427	1.28418	1.2275	1.44494	2.03339	0.85	0.9	0.95
69	female	right	2.24432	0.85846	0.926967	0.743736	1.12799	0.687513	0.94684	0.767808	0.415069	0.422013	0.334193	0.852628	0.712994	0.9	0.95	0.65
70	female	right	0.672664	1.41216	1.73239	2.2259	1.35004	1.17237	2.01104	1.35941	0.888511	0.965047	0.999991	0.656818	1.3861	0.95	0.95	0.65
71	female	right	0.836975	1.73042	0.994981	1.65773	1.35401	1.6199	1.29009	1.04925	1.48925	0.987506	1.8914	1.66863	1.691	0.95	0.8	0.65
72	female	right	0.899407	1.90403	2.2564	2.19137	1.67853	2.25548	1.78654	1.94411	2.66268	1.63126	1.41385	1.60506	1.84695	0.75	0.85	0.9
73	female	right	0.721907	0.877467	0.884997	0.787472	1.25142	0.995613	0.958236	0.914462	0.799369	0.824837	0.946865	0.898595	0.805221	0.95	0.9	0.65
74	female	right	1.47124	1.47746	1.66393	1.1738	1.42669	1.39935	1.3553	1.37967	1.55621	1.50221	1.56469	1.51228	1.0876	0.95	0.9	0.85
75	female	right	1.57991	1.39736	1.64866	1.36805	1.45385	1.05012	1.6938	1.06502	1.36284	1.46268	1.30683	1.34587	1.0212	0.9	1	0.9
76	female	left	1.9199	1.23184	0.775049	1.00602	1.07934	0.918405	1.09112	0.977161	1.08523	0.98867	1.08914	1.02283	1.09267	1	0.75	1
77	female	left	2.12096	1.04885	1.01552	0.978865	1.19919	0.969288	0.944529	1.02146	0.908128	1.12642	1.00711	0.932309	1.02152	0.8	0.85	0.9
78	female	left	0.373293	1.53311	1.9433	1.75171	1.33849	1.97321	1.90518	1.50396	2.02905	2.11027	1.96762	1.74938	1.19169	0.95	0.85	1
79	female	left	1.06978	1.65121	1.91362	1.65059	1.7551	1.40424	1.45414	1.81387	1.92817	1.80328	1.6819	1.39012	1.78081	0.9	0.9	0.6
80	female	left	0.667514	0.980657	0.970599	0.712039	1.04593	0.976339	0.760625	0.8203	0.604331	0.777988	0.781531	0.933085	0.870121	1	0.85	1
81	female	left	0.607147	1.33266	1.77972	1.56905	1.47708	1.25383	1.49058	2.07654	1.98872	2.28801	1.43205	1.43554	1.7345	0.9	1	0.4
82	female	left	0.962144	1.44664	1.10911	0.530449	1.38934	0.974367	0.929007	0.756817	0.458805	0.551542	0.333994	1.05678	0.49766	1	0.85	0.95
83	female	left	1.70444	0.443688	0.450622	0.863514	0.328451	0.327503	1.24345	0.523585	0.48252	0.983173	0.488765	0.834502	0.837492	0.85	0.95	0.8
84	female	left	1.15121	3.12127	2.7364	2.92326	3.02025	2.13506	2.62848	3.40324	2.8934	2.50165	3.21538	3.30899	2.34849	0.75	0.8	0.85
85	female	left	0.759766	1.02772	1.02986	1.06621	1.34078	1.36033	1.06029	1.45778	1.0101	0.853105	1.17959	0.98352	1.20256	0.7	0.85	0.9
86	female	left	4.83525	0.608344	0.67668	0.581679	0.861138	0.912787	0.594478	0.694853	1.03639	0.801593	0.918598	0.844361	0.621925	1	0.6	0.8
87	female	left	2.68042	0.747643	1.14732	0.627289	1.11714	0.960743	0.803007	1.07267	0.671573	0.886464	0.864826	0.766595	1.01215	0.8	0.85	1
88	female	left	0.927612	2.89658	2.43011	3.33297	3.8266	1.89864	2.33061	3.02335	1.86705	3.14302	1.54838	2.63763	2.25956	0.75	0.9	0.75
89	female	left	1.82436	1.00834	1.13739	1.13778	1.1544	0.981131	1.46205	0.99466	0.987641	1.10643	1.03801	0.957009	1.08961	0.9	0.85	0.8
90	female	left	0.956558	0.529375	0.873279	1.53469	0.342883	0.479291	0.860256	0.712007	0.453065	0.516632	1.0682	0.806787	0.76042	0.7	0.8	0.65
91	female	left	0.638283	1.56561	1.36789	0.982745	1.02259	0.792752	1.09309	1.03716	0.766606	1.32574	0.721154	0.691073	0.704271	0.75	0.9	0.9
92	female	left	0.532745	1.3656	1.39424	1.46074	1.4168	1.51048	1.5666	1.49527	0.970633	1.70344	1.82869	1.69706	1.86224	0.65	0.75	0.55
93	female	left	0.601379	1.67765	1.58004	1.40594	1.67881	1.20107	1.26856	1.19243	1.25312	1.19475	1.52267	1.00818	1.45395	0.85	0.8	0.9
94	female	left	0.823296	1.01934	1.30589	0.862324	0.911821	0.753005	1.93032	0.895627	0.866436	1.09055	0.688762	1.02243	1.06297	1	0.9	0.9
95	female	left	1.41561	1.19433	1.25479	1.23614	1.97851	0.792018	1.05453	1.29702	1.35701	0.732687	0.885483	1.23558	1.27606	1	0.8	0.95
96	female	left	0.349281	1.04098	1.13098	0.877802	0.826762	0.704902	1.59722	0.582338	1.00376	1.12473	1.49868	0.775285	0.830476	0.85	0.9	0.95
97	female	left	0.711357	1.53721	0.849093	1.11694	0.754041	1.0931	1.29813	0.650801	1.2007	0.924103	1.23215	1.37741	1.10516	1	0.65	1
98	female	left	1.44302	1.23584	1.23677	1.15889	1.25894	1.19965	0.998466	0.958954	1.2704	0.958261	1.14558	1.1237	1.19855	1	0.9	0.8
99	female	left	0.939278	1.71607	1.63991	1.75103	1.63367	1.85751	1.88955	1.99822	1.92807	1.5183	1.68928	2.08563	1.72681	0.8	0.9	0.75
100	female	left	1.04065	1.90814	2.81431	1.79271	1.41422	3.02139	1.86464	2.10783	2.08615	1.87703	2.39953	1.88758	1.68345	0.85	0.8	0.85
